# Supplementary material for: Saturation-scale functional evidence supports clinical variant interpretation in Lynch Syndrome
Source: bioRxiv or medRxiv preprint supplement (doi:10.1101/2022.08.08.22278549), 2022-08-10

## other cancer

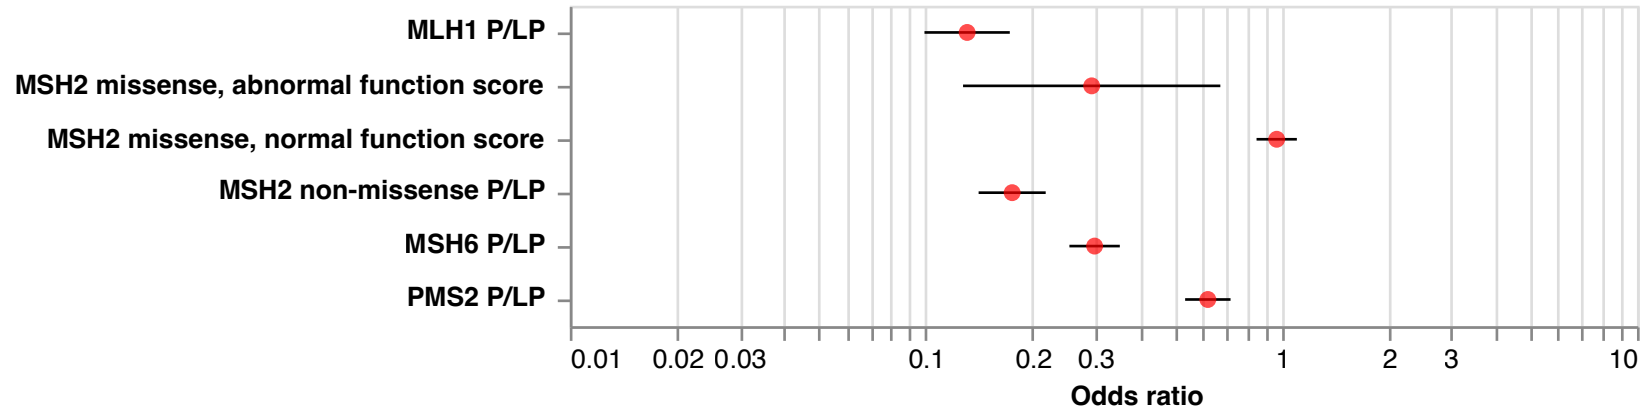

Supplement: Supplementary file [file media-4.pdf]
